# Supplementary material for: In Vitro Susceptibility to Miltefosine of Leishmania infantum (syn. L. chagasi) Isolates from Different Geographical Areas in Brazil
Source: MDPI journal article supplement (doi:10.3390/microorganisms9061228), 2021-06-05
Supplement: s1 [file s1]

## Supplementary Materials

### In Vitro Susceptibility to Miltefosine of *Leishmania infantum* (syn. *L. chagasi*) Isolates from Different Geographical Areas in Brazil.

Caroline Ricce Espada <sup>1,†</sup>, Erica V. de Castro Levatti <sup>1,†</sup>, Mariana Côrtes Boité <sup>2</sup>, Dorcas Lamounier <sup>3</sup>, Jorge Alvar <sup>4</sup>, Elisa Cupolillo <sup>2</sup>, Carlos Henrique Nery Costa <sup>3</sup>, Joelle Rode <sup>5</sup> and Silvia R. B

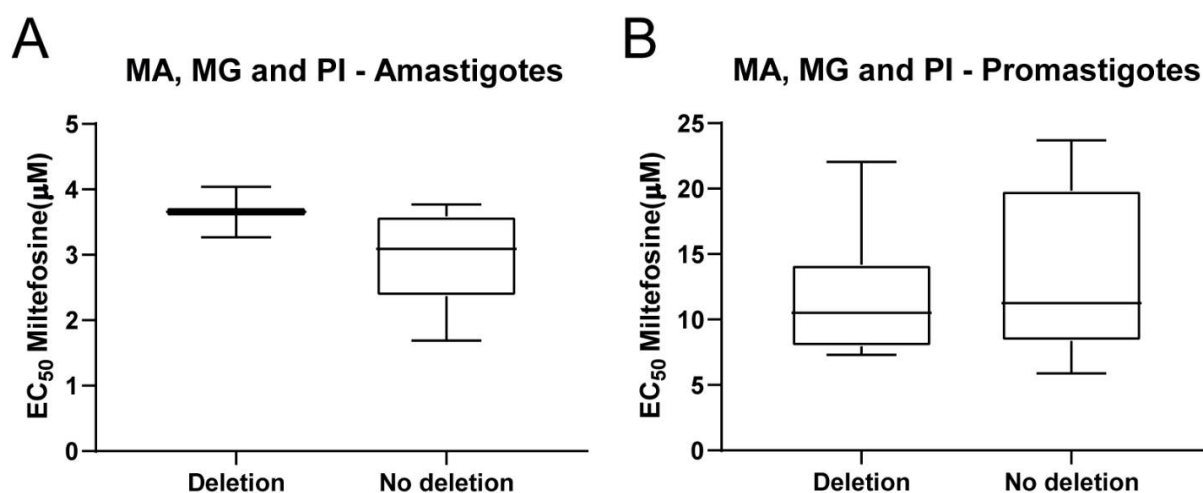

**Figure S1.** Susceptibility to miltefosine in *L. infantum* strains presenting (MSL+) or not (MSL-) the MSL locus. EC<sub>50</sub> was determined in amastigotes (A) or promastigotes (B). Distribution analysis performed with strains originating from Piauí, Maranhão and Minas Gerais Brazilian states. The central line in the box-plot represents the median values of each analyzed group.
